1 Title: A Novel Temperature Controlled Bipolar Radiofrequency Ablation: An Ex Vivo  
2 Study for Optimizing Efficacy and Safety Parameters

3  
4 Running title; A Temperature Controlled Bipolar Radiofrequency Ablation  
5

6 Osamu Inaba M.D.<sup>a</sup>, Yukihiro Inamura M.D.<sup>a</sup>, Takamitsu Takagi M.D.<sup>a</sup>, Shin Meguro  
7 M.D.<sup>a</sup>, Kentaro Nakata M.D.<sup>a</sup>, Toshiki Michishita M.D.<sup>a</sup>, Yuhei Isonaga M.D.<sup>a</sup>,  
8 Shinichi Tachibana M.D.<sup>a</sup>, Hiroaki Ohya M.D.<sup>a</sup>, Akira Sato M.D.<sup>a</sup>, Shinsuke Miyazaki  
9 M.D.<sup>b</sup>, Yasuteru Yamauchi M.D.<sup>c</sup>, Masahiko Goya M.D.<sup>d</sup>, Junichi Nitta M.D.<sup>e</sup>, and  
10 Tetsuo Sasano M.D.<sup>b</sup>

- 11  
12 a) Department of Cardiology, Japanese Red Cross Saitama Hospital, Saitama, Japan  
13 b) Department of Cardiovascular Medicine, Institute of Science Tokyo, Tokyo, Japan  
14 c) Department of Cardiology, Yokohama City Minato Red Cross Hospital, Yokohama,  
15 Japan.  
16 d) Department of Cardiology, International University of Health and Welfare, Mita  
17 Hospital, Tokyo, Japan  
18 e) Department of Cardiology, Sakakibara Heart Institute, Tokyo, Japan  
19

20 Conflict of Interest: The authors have no conflicts to disclose about this article

21 Source of funding: none

22 Address for correspondence: Osamu Inaba, MD, Department of cardiology, Japanese  
23 Red Cross Saitama Hospital, Shin-Toshin 1-5, Chu-ou-ku, Saitama, 330-8553, Japan

24 81488521111

25 81488523120 (FAX)

26 e-mail [oinbcvm@tmd.ac.jp](mailto:oinbcvm@tmd.ac.jp)

27 words count: 3537 words.

28

29 **Abstract**

30 **Background:**

31 Bipolar radiofrequency catheter ablation (BRFA) is a potential treatment for refractory  
32 ventricular arrhythmias from deep myocardial tissue. However, clear indicators of  
33 efficacy and safety remain undefined.

34 **Methods:**

35 In an ex vivo model, BRFA was performed using either the QDOT Micro™ (QDT) or  
36 Thermocool SmartTouch SF™ as the active catheter, with the DiamondTemp  
37 Ablation™ (DTA) as the return catheter. Predictors of transmural lesion formation and  
38 steam-pop occurrence were assessed.

39 **Results:**

40 A total of 391 BRFA applications were performed with variations in the interelectrode  
41 distance between the active and return catheter tips, ranging from 6 to 27 mm, under  
42 various catheter tip and tissue contact configurations. The ablation index (AI) adjusted  
43 for inter-electrode distance effectively predicted transmural lesion formation. Logistic  
44 regression analysis revealed a coefficient for AI of -0.040 (SE: 0.0067; 95% CI: [-0.053,  
45 -0.027];  $p < 0.0001$ ) and for inter-electrode distance of 2.2 (SE: 0.35; 95% CI: [1.5,  
46 2.9];  $p < 0.0001$ ). The decision boundary for transmural lesion formation was  $AI = 54 \times$   
47 inter-electrode distance – 260. When AI exceeded this value, sensitivity, specificity, and  
48 positive and negative predictive values for predicting transmural lesions were 89%,  
49 92%, 91%, and 90%, respectively. When the AI was further increased by 50, the  
50 specificity reached 100%.

51 Steam-pops on the active catheter side occurred only during power-controlled BRFA  
52 and were absent in temperature-controlled BRFA with a 45°C cutoff. On the return side,  
53 steam-pops occurred when DTA temperature exceeded 55°C, with deeper cracks  
54 observed above 60°C.

55 **Conclusions:**

56 An AI adjusted for inter-electrode distance strongly predicted transmural lesions.  
57 Temperature-controlled BRFA with a 45°C cutoff for QDT as the active catheter and  
58 55°C for DTA as the return catheter may prevent steam-pops. Additionally, steam-pops  
59 occurring at higher catheter tip temperatures were associated with deeper tissue cracks.

60

61

62

63

64

65 **Clinical Perspective**

66 *What is known?*

67 ● Bipolar radiofrequency ablation has shown promise as an effective treatment option  
68 for ventricular arrhythmias originating from deep regions of the ventricular  
69 myocardium.

70 ● The indicators for successful transmural lesion formation and the predictors for  
71 steam-pop are not yet well understood, and the accuracy of conventional metrics  
72 remains limited.

73 *What the study adds*

74 ● The ablation index (AI) necessary for achieving successful transmural lesion  
75 formation during bipolar radiofrequency ablation, using a QDOT micro™ (QDT)  
76 as the active catheter and a DiamondTemp Ablation™ (DTA) the return catheter,  
77 can be determined using the formula:  $AI = 54 \times \text{inter-electrode distance} - 260$ ,  
78 where the inter-electrode distance denotes the distance between the active and  
79 return electrodes.

80 ● During bipolar radiofrequency ablation, performing temperature-controlled ablation  
81 with a temperature cutoff of 45°C for the QDT and 55°C for the DTA may help  
82 prevent steam-pop.

83 ● Furthermore, the higher the DTA temperature at the time of steam-pop, the deeper  
84 the cracks that are formed.

85

## 86 **Introduction**

87 Radiofrequency (RF) catheter ablation is currently considered an effective option for the  
88 treatment of ventricular arrhythmias (VAs). Conventional unipolar radiofrequency  
89 ablation, which can be performed in conjunction with a variety of catheters and 3D  
90 mapping systems, is the standard method. However, its efficacy is limited when the  
91 origin of the VAs is intramural.

92 Bipolar RF catheter ablation (BRFA) is one of the next options for applying  
93 radiofrequency current to areas where it is difficult to form lesions deep enough using  
94 conventional unipolar ablation. (1) In BRFA, a RF current is passed between two  
95 catheters, an active catheter connected to the active port of the RF generator, and a  
96 return catheter connected to the indifferent electrode port instead of a return electrode  
97 patch, making it possible to form a deep ablation lesion between the two electrodes. The  
98 efficacy and safety of BRFA is gradually being recognized (2-5), but the cables  
99 connecting the generator and the return electrode are not widely commercially available  
100 and often have to be custom made. Furthermore, there are currently no established  
101 ablation settings or safety indicators for BRFA, and, because this is off-label use,  
102 catheter manufacturers also do not have sufficient data. Because serious complications  
103 of BRFA have been reported, it is important to establish efficacy and safety parameters  
104 of BRFA (6,7).

105 For conventional unipolar RF ablation, the ablation index (AI) was developed  
106 as a quantitative ablation lesion predictor, that includes contact force (CF), RF  
107 application time, and RF power in a weighted formula. The first aim of this study

108 examined whether AI could be used to predict intermural lesion formation in BRFA as  
109 an efficacy parameter.

110 For a safety indicator, we focused on monitoring electrode temperature during  
111 BRFA. Recently, we reported a case of ventricular tachycardia in which  
112 temperature-controlled BRFA was successfully performed from both the endocardium  
113 and epicardium using a diamond embedded tip catheter (DiamondTemp Ablation [DTA]  
114 system [Medtronic, Inc., Minneapolis, Minnesota, USA]). (8) In temperature-controlled  
115 mode, the RF output is attenuated as the tissue surface temperature increases,  
116 potentially preventing steam-pop. DTA is open-irrigated but can measure the  
117 temperature of the tissue surface with high sensitivity, making temperature-controlled  
118 ablation possible.

119 Furthermore, in recent years, QDOT micro<sup>TM</sup> (QDT); Biosense Webstar, Irvine,  
120 California, USA have become widely available, enabling temperature-controlled  
121 ablation using the CARTO (Biosense Webstar, Irvine, California, USA). In the latter  
122 aim of the study, the safety of temperature-controlled BRFA and the relationship  
123 between electrode temperature and steam-pop during BRFA were investigated.

124

## 125 **Methods**

126 Fresh porcine ventricles were obtained commercially within 48 hours of sacrifice. A  
127 porcine ventricular tissue was fixed in a water pool filled with 37-degree saline, and an  
128 active catheter was perpendicularly placed on the endocardial side and a return catheter  
129 on the epicardial side. In this ex vivo study, we used a Thermocool SMARTTOUCH  
130 SF<sup>TM</sup> (STSF); Biosense Webstar, Irvine, California, USA or a QDT, which is capable of

131 monitoring AI during RF application as the active catheter and a DTA as the return  
132 catheter to examine the usefulness of the ablation index in BRFA using the CARTO  
133 system.

134 An active catheter was connected to the active port of the radiofrequency  
135 generator of CARTO (nGEN, Biosense Webster, Irvine, California, USA), and DTA as a  
136 return catheter was connected to ground electrode port of nGEN via generator  
137 connection box and pin box using alligator clip. (Figure 1 Main)

138 This study was divided into two parts. In the first part, to investigate the  
139 optimal AI value for forming an intermural lesion, QDT and DTA were attached to  
140 ventricular muscle tissue in four configurations: both perpendicular with slight angle,  
141 QDT perpendicular and DTA parallel, both parallel, and QDT parallel and DTA  
142 perpendicular (Model 1A, B, C, D, Figure 1 A, B, C, D). In this process, since previous  
143 studies have reported that proper attachment of the second ring electrode in DTA is  
144 crucial, it was slightly angled to ensure the second electrode contacted with the tissue  
145 before applying the BRFA when attaching DTA perpendicularly. (9)

146 The purpose of the second part was to examine steam-pop prediction. Both  
147 QDT and STSF were used as active catheters, and to make audible steam-pop more  
148 likely to occur, the DTA electrode was inserted between the myocardium and a synthetic  
149 resin base and attached parallel to the myocardium to concentrate the RF current in a  
150 narrower area and make it easier to raise the tissue temperature. (Model 2, Figure 1E).

151 In addition to these ablation sets, another lesion set was examined where only  
152 the distal thin-tip electrode of the DTA was completely perpendicularly attached to the  
153 tissue for current application. (Model 3, Figure 1F)

154 In each model, the target AI was set, and ablation was started with a CF of  
155 about 5 to 15 g and a power output of 25 to 40 W. For all ablations using QDT,  
156 QMODE<sup>TM</sup> was used with a temperature cutoff set at 45 °C. The irrigation flow for  
157 BRFA using the QDT was regulated by temperature control with QMODE<sup>TM</sup>, while for  
158 BRFA using the STSF, it was set to 15 ml/min higher than 30W, and 8 ml/min at 30W or  
159 lower. The irrigation flow for the DTA was manually set to 8 ml/min during RF delivery.  
160 Ablation was stopped when an audible steam-pop occurred. The temperature and  
161 impedance of the DTA were visually monitored and recorded.

162 After ablation, myocardial sections were cut and visually inspected to confirm  
163 whether transmural lesions were formed. Additionally, the distance between the two  
164 electrodes where BRFA was performed was measured. The target AI was gradually  
165 increased from a lower initial value until transmural lesions were formed. For sections  
166 where a steam-pop occurred, the specific side of the catheter where the steam-pop  
167 occurred was visually recorded in addition to noting the tactile sensation experienced by  
168 the catheter operator. Furthermore, the extent of the cracks was also measured. During  
169 lesion confirmation, the measurers were blinded to the AI and the type of active catheter  
170 used.

171 In the examination of the effectiveness of AI, for both Model 1 and Model 2,  
172 the AI, the distance between electrodes of QDT/STSF and DTA used in BRFA  
173 (inter-electrode distance), CF, BRFA duration, energy, circuit impedance drop rate (%  
174 Impedance drop), temperature of the DTA and the values of AI, BRFA duration, and  
175 energy divided by the inter-electrode distance (AI/inter-electrode distance, BRFA



176 duration/inter-electrode distance and energy/inter-electrode distance) were investigated  
177 for ablations that resulted in transmural lesions and those that did not.

178 In the examination of steam-pops, the same parameters were investigated for  
179 sections where steam-pops occurred and those where they did not. Additionally, the  
180 depth of the cracks caused by steam-pop was classified into four categories: less than  
181 25% of the surface or not visible to the naked eye, 25% to 50% of the surface, more  
182 than 50% of the surface with partial incompleteness, and through-wall cracks. This  
183 study was performed in accordance with the Guide for the Care and Use of Laboratory  
184 Animals published by the U.S. National Institutes of Health.

#### 185 **Statistical Analysis**

186 Continuous data are given as mean  $\pm$  standard deviation if normally distributed or the  
187 median, maximum, and minimum values if not normally distributed. Categorical data  
188 are given as counts and percentages. Continuous data were compared using Student's t  
189 test or one-way analysis of variance when normally distributed or Mann-Whitney U test  
190 when not normally distributed. Categorical data were compared using  $\chi^2$  test across the  
191 groups.

192 Factors related to the formation of transmural lesions were analyzed using  
193 univariate analysis, and the relationship between those factors and inter-electrode  
194 distance was examined on a scatter plot. Furthermore, on that scatter plot, the BRFA  
195 application groups that could and could not form transmural lesions were depicted  
196 separately. A logistic regression model was employed to determine the decision  
197 boundary between the groups. The decision boundary, where the probability of an  
198 observed value belonging to the transmural lesion group is 0.5, was plotted, and the

199 equations related to the formation of transmural lesions based on the inter-electrode  
200 distance required for lesion formation were derived. Additionally, the sensitivity,  
201 specificity, and positive and negative predictive values of BRFA applications beyond the  
202 AI threshold—calculated based on electrode distance using the decision boundary  
203 formula—were assessed for their effectiveness in predicting transmural lesion formation.  
204 The level of significance was set at  $P < 0.05$ .

205 Analyses were performed with JMP<sup>®</sup> 14 (SAS Institute Inc., Cary, NC).

206

## 207 **Results**

### 208 **Evaluation of AI and Transmural Lesion Formation**

209 In total, 391 BRFA were performed on slices of varying thickness with inter-electrode  
210 distances ranging from 6 to 27 mm, and no damage occurred to the CARTO system or  
211 the generators of CARTO and DTA. Two-hundred-thirty-three ablations were performed  
212 in Model 1 and 148 ablations in Model 2, resulting in 127 transmural lesions in Model 1  
213 and 109 transmural lesions in Model 2.

214 In Model 1 overall, except for the average CF, average power and maximum  
215 temperature of DTA, all parameters showed higher values in the ablations where  
216 transmural lesions were formed (AI:  $680 \pm 240$ ,  $580 \pm 200$ ,  $p = 0.0005$ ; AI/inter-electrode  
217 distance:  $46 \pm 7.6$ ,  $32 \pm 5.8$ ,  $p < 0.0001$ ; BRFA duration: 64 [6.2 - 630], 40 [3.7 - 520],  
218  $p = 0.0004$ ; BRFA duration/inter-electrode distance: 4.7 [0.62 - 23], 2.2 [0.32 - 21],  
219  $p < 0.0001$ ; Energy: 2300 [220 - 220000], 1500 [130 - 14000],  $p = 0.0011$ ;  
220 Energy/inter-electrode distance: 150 [11 - 820], 100 [12 - 560],  $p < 0.0001$ ; maximum %  
221 Impedance drop:  $16 \pm 4.1$ ,  $13 \pm 3.4$ ,  $p < 0.0001$ ; inter-electrode distance : 14 [6 - 27], 18

222 [8 - 27],  $p < 0.0001$ ) (Table 1). Among these, only AI/inter-electrode distance and BRFA  
223 duration/inter-electrode distance showed significantly higher values in the ablations  
224 where transmural lesions were formed across all variations of catheter tip configurations  
225 from Model 1A to 1D. (Supplemental Table 1)

226 As the inter-electrode distance increases, the AI required for transmural lesion  
227 formation increases linearly. (Figure 2A) Logistic regression analysis revealed that the  
228 regression coefficient for AI was -0.040 (standard error: 0.0067; 95% confidence  
229 interval: [-0.053, -0.027];  $p < 0.0001$ ), while the regression coefficient for  
230 inter-electrode distance was 2.2 (standard error: 0.35; 95% confidence interval: [1.5,  
231 2.9];  $p < 0.0001$ ). Based on these results, the decision boundary for achieving or not  
232 achieving transmural lesion was calculated as:  $AI = 54 \times \text{inter-electrode distance} - 260$ .  
233 Out of the 127 ablations where transmural lesions were formed, 117 ablations had AI  
234 values exceeding the decision boundary formula, while out of the 106 ablations where  
235 transmural lesions were not formed, 94 ablations had AI values below the decision  
236 boundary formula. The sensitivity, specificity, and positive and negative predictive  
237 values of the decision boundary for transmural lesion formation were 89%, 92%, 91%,  
238 and 90%, respectively. The relationship between AI and inter-electrode distance for  
239 ablations that achieved transmural lesion formation and those that did not, in each  
240 catheter tip configuration, is shown in the Supplemental Figure 1.

241 Regarding the analysis of BRFA duration, it was observed from the scatter plot  
242 that taking the natural logarithm of BRFA duration ( $\ln(\text{BRFA duration})$ ) reveals a linear  
243 boundary between ablations that formed transmural lesions and those that did not. In  
244 logistic regression analysis, the regression coefficient for the natural logarithm of BRFA

245 duration was -7.0 (standard error: 1.1; 95% confidence interval [-9.3, -5.1],  $p < 0.0001$ ),  
246 and the regression coefficient for the inter-electrode distance was 1.6 (standard error:  
247 0.25; 95% confidence interval [1.2, 2.2],  $p < 0.0001$ ). The decision boundary for  
248 achieving or not achieving transmural lesion was calculated as:  $\ln(\text{BRFA duration}) =$   
249  $0.23 \times \text{inter-electrode distance} + 0.16$ . (Figure 2B) Similarly to the AI analysis, the  
250 sensitivity, specificity, and positive and negative predictive values for the decision  
251 boundary for transmural lesion formation based on  $\ln(\text{BRFA duration})$  were calculated  
252 as 95%, 85%, 88%, and 94%, respectively.

### 253 **Evaluation of Steam-Pop**

254 In Model 2, A total of 123 temperature-controlled ablations using QDT and 25  
255 power-controlled ablations using STSF were performed, and 46 steam-pops were  
256 observed. Meanwhile, in Model 1, where all ablations were performed with temperature  
257 control, only 3 steam-pops occurred out of 233 applications.

258 All the steam-pops in Model 1 occurred on the return catheter side 47 to 67  
259 seconds after the start of the ablation. At that time, the % Impedance drop was 17 to  
260 21%, the temperature of DTA was 58 to 71 degrees, and the crack penetration depth was  
261 less than 50%. In Model 2, a comparison between 102 ablations without steam-pop and  
262 46 ablations with steam-pop revealed that temperature-controlled ablations were more  
263 frequent in the ablations without steam-pop, whereas power-controlled ablations were  
264 more common in the ablation with steam-pop. In temperature-controlled ablations, all  
265 32 steam-pops occurred on the return electrode side, while in power-controlled ablations,  
266 one steam-pop occurred on the active electrode side and the last 13 steam-pops occurred  
267 on the return electrode side. The ablations with steam-pops had significantly higher for

268 average power, % Impedance drop, and DTA temperature compared to the ablations  
269 without steam-pops (Average Power:  $28\pm 10$ ,  $35\pm 5.9$ ,  $p<0.0001$ ; maximum %  
270 Impedance drop:  $22\pm 6.2$ ,  $25\pm 3.7$ ,  $p=0.0007$ ; maximum temperature of DTA:  $60\pm 7.7$ ,  
271  $66\pm 5.3$ ,  $p<0.0001$ ) (Table 2).

272         Among the 46 steam-pops that occurred in Model 2, an analysis of the 45  
273 instances that occurred on the DTA side revealed that all steam-pops occurred when the  
274 DTA temperature  $55\text{ }^{\circ}\text{C}$  or higher, and the % Impedance drop exceeded  $13\Omega$ . Steam-pop  
275 did not occur when the DTA temperature was below  $55^{\circ}\text{C}$  or when the % Impedance  
276 drop was less than  $13\Omega$ . Figure 3A shows a plot of the maximum temperature of the  
277 DTA during ablation where steam-pop did not occur and the DTA temperature at the  
278 time of steam-pop during ablation where steam-pop occurred. When the DTA  
279 temperature cutoff is set at  $55^{\circ}\text{C}$ , the sensitivity, specificity, positive predictive value,  
280 and negative predictive value for predicting steam-pop occurrence are 100%, 27%, 38%,  
281 and 100%, respectively.

282         Similarly, Figure 3B shows a plot of the % Impedance drop. When the %Imp  
283 drop cutoff is set at 13%, the sensitivity, specificity, positive predictive value, and  
284 negative predictive value for predicting steam-pop occurrence are 100%, 8.8%, 33%,  
285 and 100%, respectively.

286         Furthermore, the higher the DTA temperature when steam-pop occurred, the  
287 larger the cracks that formed. The cracks penetrating 25% or more of the depth were  
288 observed only when the DTA temperature was  $60\text{ }^{\circ}\text{C}$  or higher. Cracks confined to the  
289 mid-myocardium were not observed in these ablations. (Figure 4A) A similar result was

290 also observed with the % Impedance drop at steam-pop. Cracks that extended beyond  
291 50% were only formed when the % Impedance drop exceeded 21%. (Figure 4B)

### 292 **Model 3: A special catheter configuration**

293 Lastly, 10 BRFA procedures were performed in Model 3, where only the distal 0.6 mm  
294 electrode of the DTA was attached to the myocardial tissue, and the second electrode  
295 was not attached. BRFA procedures with AI 400-750 were applied to myocardial tissue  
296 with an inter-electrode distance of 11 mm to 15 mm. However, no transmural lesions  
297 were formed, and lesion formation on the return electrode side was either absent or  
298 minimal. The highest temperature of the DTA remained below 46 °C. (Table 3)

### 299 **Discussion**

300 This study is the first ex vivo study to investigate transmural and steam-pop  
301 occurrence in BRFA using QDT and DTA. This study has three notable points. First, it  
302 was found that performing BRFA using QDT as the active catheter and DTA as the  
303 return catheter is likely to not cause malfunctions with the system used in this study. As  
304 previously mentioned, BRFA is an off-label use, and the catheter manufacturers do not  
305 have data regarding potential system malfunctions. Therefore, the fact that nearly 400  
306 BRFA procedures did not cause any issues with the CARTO system or the DTA  
307 generator is valuable information.

308         Second, this is the first report to confirm that AI can predict transmural lesion  
309 formation in BRFA. Previous studies have reported that factors related to transmural  
310 in BRFA include total energy (10), thickness of the myocardium (11), use of a 3.5mm  
311 tip irrigated catheter (11), BRFA duration (12), impedance drop (12) and contact surface  
312 area of the return catheter (13). The results of the present study indicated that the

313 inter-electrode distance and the corresponding AI or BRFA duration were crucial in  
314 transmural lesion formation. As the inter-electrode distance increased, the AI and the In  
315 (BRFA duration) required to achieve transmural lesion formation increased linearly up  
316 to an inter-electrode distance of 27 mm. In this study, both AI and In (BRFA duration)  
317 yielded highly accurate predictive formulas for achieving transmural lesion formation.  
318 This may be attributed to the fact that the CF of the active catheter was controlled  
319 around 10 g and the power was controlled at approximately 35W.

320         When performing BRFA under this study setting, it is considered more  
321 reasonable to use AI for the following reasons. First, if BRFA were conducted with a  
322 wider range of CF and power, the results might differ. Second, AI is automatically  
323 calculated and does not require logarithmic computation. Third, the predictive formula  
324 for transmural lesion formation using AI has higher specificity compared to the one  
325 using In (BRFA duration). To further increase the specificity of transmural lesion  
326 formation, adding 50 to the calculated AI value from this equation could achieve 100%  
327 specificity for transmural lesion formation.

328         The third notable point of this study is the potential for electrode temperature  
329 monitoring to predict steam-pop occurrence. The factors related with steam-pop  
330 occurrence during BRFA were previously reported as impedance drop (9) (14),  
331 temperature of endocardial catheter (10), RF time (12) and high power (12) but  
332 regarding impedance drop, there are also conflicting reports (15). In unipolar ablation,  
333 Leshem et al. reported that temperature-controlled ablation using QDOT can create  
334 comparable lesion formation without increasing the incidence of steam-pop compared to  
335 power-controlled ablation (16). In their study, no steam-pop occurred when the targeted

336 temperature of QDOT was set to 45°C, while steam-pop did occur when set to 50°C,  
337 though it was less frequent compared to power-controlled ablation. Nomura et al.  
338 reported that regarding DTA, steam-pop occurred only when the catheter tip of the DTA  
339 was applied perpendicularly during ablation with a targeted temperature set at 58°C (17).  
340 Al-Sheikhli et al. reported that steam-pop and cardiac tamponade occurred in one  
341 patient during one of 10 VT ablations with DTA, using a default target temperature of  
342 60°C and an initial power of 50 W (18).

343         The results of the study showed that temperature-controlled BRFA using  
344 QMODE with a cutoff of 45°C could prevent steam-pops on the active catheter side.  
345 Additionally, no steam-pops occurred when the temperature of the opposing DTA  
346 remained below 55°C. In BRFA, the area most likely to be heated is directly beneath the  
347 contact points between the tissue and each of the two electrodes where the  
348 radiofrequency current converges, as suggested by computer simulation models. (19)  
349 Therefore, monitoring the surface temperature of both electrodes to prevent steam-pop  
350 at each location is valuable. From these results, it is suggested that during QMODE  
351 ablation set at 45°C, visually monitoring the temperature of the opposing DTA and  
352 manually reducing the output of QDT when the temperature exceeds 55°C may help  
353 prevent steam-pops on both sides. Using a non-irrigated tip catheter as the return  
354 catheter allows for the measurement of the myocardial surface temperature on the  
355 opposite side; however, if the tip is not irrigated, there is a risk of thrombosis. While an  
356 irrigated tip might cool the temperature sensor itself, DTA, utilizing the high thermal  
357 conductivity of diamond, enables effective temperature monitoring. Therefore, using  
358 DTA as the return catheter is reasonable. In this study, % Impedance drop was also



359 useful for predicting steam-pop. Saito et al. reported that the frequency of steam-pop  
360 decreased when BRFA was performed with reduced power according to the %Imp drop.  
361 (20) In this study, it was not verified whether controlling the power output according to  
362 DTA temperature could prevent steam-pop. However, in terms of steam-pop occurrence,  
363 DTA temperature had much higher specificity compared to % Impedance drop. This  
364 result is likely because % Impedance drop can be influenced by the temperature  
365 increase in all regions through which the radiofrequency current flows, whereas DTA  
366 can measure the temperature specifically in the tissue surface where the catheter tip  
367 makes contact, which is near the region most susceptible to steam-pop occurrence.

368 In the validation of Model 3, lesions were hardly formed when only the distal  
369 small tip of the DTA was in contact with the tissue during ablation. This was likely  
370 because the proximal larger tip of the DTA was floating in the saline, causing the  
371 radiofrequency current to bypass the myocardial tissue and flow from the saline to the  
372 proximal larger tip, resulting in insufficient heating of the tissue. The distal small tip is  
373 0.6 mm long, and in practice, it is unlikely that only this electrode would make contact  
374 with the tissue. However, if, as indicated by the results of this study, there is little  
375 temperature rise in the DTA, it may be worth considering adjusting the positioning of  
376 the DTA to ensure effective ablation.

377

### 378 **Study Limitations**

379 This study has some limitations. As mentioned earlier, CF and power were controlled to  
380 some extent in this study, and altering the range of these parameters could lead to

381 different results. Second, it is unclear whether similar results would be obtained with  
382 BRFA using an inter-electrode distance of 28 mm or more.

### 383 **Conclusions**

384 AI adjusted for inter-electrode distance proved to be highly significant for achieving  
385 transmural lesion formation during BRFA. Furthermore, temperature-controlled ablation  
386 using QDT and DTA demonstrated potential for predicting steam-pop during BRFA.

### 387 **References**

- 388 1) Victor Neira, Pasquale Santangeli, Piotr Futyma, John Sapp, Miguel Valderrabano,  
389 Fermin Garcia, Andres Enriquez. Heart Rhythm. 2020 Jul;17:1176-1184.
- 390 2) Igarashi M, Nogami A, Fukamizu S, et al. Acute and long-term results of bipolar  
391 radiofrequency catheter ablation of refractory ventricular arrhythmias of deep  
392 intramural origin. Heart Rhythm. 2020;17:1500-7.
- 393 3) Futyma P, Ciapała K, Głuszczyk R, et al. Bipolar ablation of refractory atrial and  
394 ventricular arrhythmias: Importance of temperature values of intracardiac return  
395 electrodes. J Cardiovasc Electrophysiol. 2019;30:1718-26.
- 396 4) Futyma P, Ciapala K, Sander J, et al. Bipolar Radiofrequency Ablation of  
397 Ventricular Arrhythmias Originating in the Vicinity of His Bundle. Circ Arrhythm  
398 Electrophysiol . 2020 Mar;13:e008165.
- 399 5) Andres Enriquez, Matthew Hanson, Babak Nazer, Douglas N Gibson, Oscar Cano,  
400 Sayuri Tokioka, Seiji Fukamizu, Pablo Sanchez Millan, Carolina Hoyos, Carlos  
401 Matos, William H Sauer, Usha Tedrow, Jorge Romero, Victor Neira, Marian Futyma,  
402 Piotr Futyma. Bipolar ablation involving coronary venous system for refractory left  
403 ventricular summit arrhythmias. Heart Rhythm O2. 2023 Nov 24; 5:24-33.

- 404 6) Timothy R Maher, Adnan S Raza, Carlos Tapias, Fermin Garcia, Matthew R  
405 Reynolds, G Muqtada Chaudry, Luis C Saenz, Miguel Valderrábano, Andre d'Avila.  
406 Ventricular septal defect as a complication of bipolar radiofrequency ablation for  
407 ventricular tachycardia. *Heart Rhythm*. 2024 Jun;21: 950-955.
- 408 7) Piotr Kulakowski, Pawel Derejko, Jacek Kusnierz, Jakub Baran, Urszula Hangiel,  
409 Izabela Janus, Agnieszka Noszczyk-Nowak. Fatal Complication of Endo-Epicardial  
410 Bipolar Radiofrequency Ablation During Animal Experiment. *JACC Clin  
411 Electrophysiol*. 2023 Jun;9:886-888.
- 412 8) Osamu Inaba, Yukihiro Inamura, Takamitsu Takagi, Akira Sato, Masahiko Goya,  
413 Tetsuo Sasano. First Experience of Temperature-Controlled Bipolar Radiofrequency  
414 Ablation of Ventricular Tachycardia Originating from the Anterior Left Ventricle  
415 Using a Diamond Embedded Tip Catheter. *HeartRhythm Case Rep*. 2023 May  
416 18;9:529-533.
- 417 9) Sho Ogiso, Hidehira Fukaya, Emiyu Ogawa, Hitoshi Mori, Yuya Masuda, Yuto  
418 Yazaki, Yusuke Murayama, Daiki Saito, Shuhei Kobayashi, Hironori Nakamura,  
419 Naruya Ishizue, Jun Kishihara, Shinichi Niwano, Jun Oikawa, Junya Ako. "Honey  
420 pot"-like lesion formation: Impact of catheter contact angle on lesion formation by  
421 novel diamond-embedded temperature-controlled ablation catheter in a porcine  
422 experimental model. *Heart Rhythm*. 2024 May 15:S1547-5271(24)02569-4.
- 423 10) Paweł Derejko, Izabela Janus, Piotr Kułakowski, Jacek Kuśnierz, Jakub Baran,  
424 Urszula Hangiel, Joanna Proszek, Piotr Frydrychowski, Marcin Michałek,  
425 Agnieszka Noszczyk-Nowak et al. Bipolar endo-epicardial RF ablation: Animal  
426 feasibility study *Heart Rhythm*. 2024 Jun;21(6):790-798.

- 427 11) Duy T Nguyen, Wendy S Tzou, Michael Brunnquell, Matthew Zipse, Joseph L  
428 Schuller, Lijun Zheng, Ryan A Aleong, William H Sauer. Clinical and biophysical  
429 evaluation of variable bipolar configurations during radiofrequency ablation for  
430 treatment of ventricular arrhythmias. *Heart Rhythm*. 2016 Nov;13(11):2161-2171.
- 431 12) Mathews John, Ashley Rook, Allison Post, Alton Mersman, Whitney Allen,  
432 Christina Schramm, Mehdi Razavi. Bipolar ablation's unique paradigm: Duration  
433 and power as respectively distinct primary determinants of transmural and steam  
434 pop formation. *Heart Rhythm O2*. 2020 Jun 24;1(4):290-296.
- 435 13) Arwa Younis, Hagai D Yavin, Koji Higuchi, Israel Zilberman, Jakub Sroubek,  
436 Patrick Tchou, Zachary P Bubar, Michael Barkagan, Eran Leshem, Ayelet  
437 Shapira-Daniels, Mohamad Kanj, Daniel J Cantillon, Ayman A Hussein, Khaldoun  
438 G Tarakji, Walid I Saliba, Jacob S Koruth, Elad Anter. Increasing Lesion  
439 Dimensions of Bipolar Ablation by Modulating the Surface Area of the Return  
440 Electrode. *JACC Clin Electrophysiol*. 2022 Apr;8(4):498-510.
- 441 14) Abhishek Bhaskaran, Ahmed Niri, Mohammed Ali Azam, Sachin Nayyar, Andreu  
442 Porta-Sánchez, Stéphane Massé, Timothy Liang, Arulalan Veluppillai, Beibei Du,  
443 Patrick F H Lai, Andrew Ha, Kumaraswamy Nanthakumar. Safety, efficacy, and  
444 monitoring of bipolar radiofrequency ablation in beating myopathic human and  
445 healthy swine hearts *Heart Rhythm*. 2021 Oct;18(10):1772-1779.
- 446 15) Shinwan Kany, Fares Alexander Alken, Ruben Schleberger, Jakub Baran, Armin  
447 Luik, Annika Haas, Elena Ene, Thomas Deneke, L Dinshaw, Andreas Rillig,  
448 Andreas Metzner, Bruno Reissmann, Hisaki Makimoto, Tilko Reents, Miruna  
449 Andrea Popa, Isabel Deisenhofer, Roman Piotrowski, Piotr Kulakowski, Paulus

- 450 Kirchhof, Katharina Scherschel, Christian Meyer. Bipolar ablation of  
451 therapy-refractory ventricular arrhythmias: application of a dedicated approach.  
452 *Europace*. 2022 Jul 15;24(6):959-969.
- 453 16) Eran Leshem, Israel Zilberman, Michael Barkagan, Ayelet Shapira-Daniels, Jakub  
454 Sroubek, Assaf Govari, Alfred E Buxton, Elad Anter. Temperature-Controlled  
455 Radiofrequency Ablation Using Irrigated Catheters: Maximizing Ventricular Lesion  
456 Dimensions While Reducing Steam-Pop Formation. *JACC Clin Electrophysiol*  
457 2020 Jan;6(1):83-93.
- 458 17) Takehiro Nomura, Manabu Maeda, Daiki Kumazawa, Yosuke Mizuno, Kosuke  
459 Onodera, Shigeru Toyoda, Kennosuke Yamashita. The effect of ablation settings on  
460 lesion characteristics with DiamondTemp ablation system: An ex vivo experiment.  
461 *J Arrhythm*. 2023 Dec 6;40(1):109-117.
- 462 18) Jaffar Al-Sheikhli, Ian Patchett, Ven Gee Lim, Leeann Marshall, Will Foster,  
463 Michael Kuehl, Shamil Yusuf, Sandeep Panikker, Kiran Patel, Faizel Osman,  
464 Prithwish Banerjee, Nicolas Lellouche, Tarvinder Dhanjal. Initial experience of  
465 temperature-controlled irrigated radiofrequency ablation for ischaemic  
466 cardiomyopathy ventricular tachycardia ablation. *J Interv Card Electrophysiol*. 2023  
467 Apr;66(3):551-559.
- 468 19) Yao Sun, Xin Zhu, Wenxi Chen, Weihao Weng, Kejiro Nakamura. Computer  
469 simulation of low-power and long-duration bipolar radiofrequency ablation under  
470 various baseline impedances. *Med Eng Phys* . 2024 Sep:131:104226.
- 471 20) Osamu Saitoh, Takumi Kasai, Kyogo Fuse, Ayaka Oikawa, Hiroshi Furushima,  
472 Masaomi Chinushi. Impedance-decline-guide power control long application time

473 bipolar radiofrequency catheter ablation. J Cardiovasc Electrophysiol. 2022

474 Dec;33(12):2538-2545.

475

476 Table 1. Comparison of BRFA parameters between ablations with and without  
477 transmural lesion formation.

|                                               | transmural lesion (+) | transmural lesion (-) |         |
|-----------------------------------------------|-----------------------|-----------------------|---------|
| <b>All catheter configurations in Model 1</b> | N = 127               | N = 106               |         |
| AI                                            | 680±240               | 580±200               | 0.0005  |
| AI / inter-electrode distance                 | 46±7.6                | 32±5.8                | <0.0001 |
| BRFA duration (sec)                           | 64 [6.2 - 630]        | 40 [3.7 - 520]        | 0.0004  |
| BRFA duration / inter-electrode distance      | 4.7 [0.62 - 23]       | 2.2 [0.32 - 21]       | <0.0001 |
| average CF (g)                                | 11±2.9                | 11±2.4                | 0.34    |
| average Power (W)                             | 35±2.8                | 36±4.3                | 0.006   |
| Energy (J)                                    | 2300 [220 - 220000]   | 1500 [130 - 14000]    | 0.0011  |
| Energy / inter-electrode distance             | 150 [11 - 820]        | 100 [12 - 560]        | <0.0001 |
| maximum % Impedance drop                      | 16±4.1                | 13±3.4                | <0.0001 |
| maximum temperature of DTA (degree)           | 60±5.4                | 59±6.5                | 0.24    |
| Inter-electrode distance (mm)                 | 14 [6 - 27]           | 18 [8 - 27]           | <0.0001 |

478 BRFA, bipolar radiofrequency catheter ablation; AI, ablation index; inter-electrode

479 distance, the distance between electrodes; RF, radiofrequency; CF, contact force; %

480 Impedance drop, the rate of generator impedance drop; DTA, DiamondTemp Ablation

481

482 Table 2. Comparison of protocols and parameters between ablations with and  
483 without steam-pop occurrence in Model 2.

|                               | Steam-pop (-) | Steam-pop (+)                                | p value |
|-------------------------------|---------------|----------------------------------------------|---------|
| <b>Model 2</b>                | N = 102       | N = 46                                       |         |
| Ablation mode                 |               |                                              | 0.0062  |
| Temperature-controlled (QDT)  | 91(74%)       | 32(26%)                                      |         |
| Power-controlled (STSF)       | 11(44%)       | 14(56%)                                      |         |
| Titration                     | 41(40%)       | 10(20%)                                      | 0.019   |
| The side of steam-pop         |               | Active, STSF 1<br>Active, QDT 0<br>Return 45 |         |
| Average CF (g)                | 12±4.7        | 11±4.7                                       | 0.34    |
| Average Power (w)             | 28±10         | 35±5.9                                       | <0.0001 |
| AI                            | 570±210       | 550±120                                      | 0.52    |
| % Impedance drop (%)          |               |                                              |         |
| at 3sec                       | 8.7±2.7       | 9.7±1.9                                      | 0.029   |
| at 5sec                       | 11±3.5        | 13±2.4                                       | 0.0063  |
| at 10sec                      | 14±4.6        | 17±3.4                                       | <0.0001 |
| maximum                       | 22±6.2        | 25±3.7                                       | 0.0007  |
| when pop                      |               | 24±4.3                                       |         |
| Temperature of DTA (degree)   |               |                                              |         |
| at10 sec                      | 55±7.5        | 60±4.6                                       | <0.0001 |
| Maximum                       | 60±7.7        | 66±5.3                                       | <0.0001 |
| when pop                      |               | 65[55 - 75]                                  |         |
| Inter-electrode distance (mm) | 15±4.6        | 14±3.7                                       | 0.016   |

484



485 QDT, QDOT micro<sup>TM</sup>; STSF, Thermocool SMARTTOUCH SF<sup>TM</sup>, For other  
486 abbreviations, see Table 1.

487 Table 3. Ablation parameters and lesion depth and size on each electrode side during  
488 BRFA performed with only the distal small tip of the DTA in contact with the tissue

| <b>Model 3</b>                      | <b>N = 10</b>     |
|-------------------------------------|-------------------|
| AI                                  | 520 ± 120         |
| AI / inter-electrode distance       | 36 ± 8.2          |
| BRFA duration (sec)                 | 32 [19 - 72]      |
| RF time / inter-electrode distance  | 2.5 [1.3 - 5.1]   |
| average CF (g)                      | 11 ± 4.1          |
| average Power (W)                   | 35                |
| Energy (J)                          | 1100 [670 - 2500] |
| Energy / inter-electrode distance   | 87 [45 - 180]     |
| maximum % Impedance drop (%)        | 8.6 ± 1.6         |
| maximum temperature of DTA (degree) | 45 ± 0.67         |
| Inter-electrode distance (mm)       | 15 [11 - 15]      |
| Active electrode                    |                   |
| lesion depth (mm)                   | 3.9 ± 1.0         |
| lesion short axis (mm)              | 5.8 ± 1.1         |
| Return electrode                    |                   |
| lesion depth (mm)                   | 0 [0 - 2]         |
| lesion short axis (mm)              | 0 [0 - 2]         |

489

490 Abbreviations are the same as in Table 1 and 2.

491

492 Figure 1

Figure 1 Main

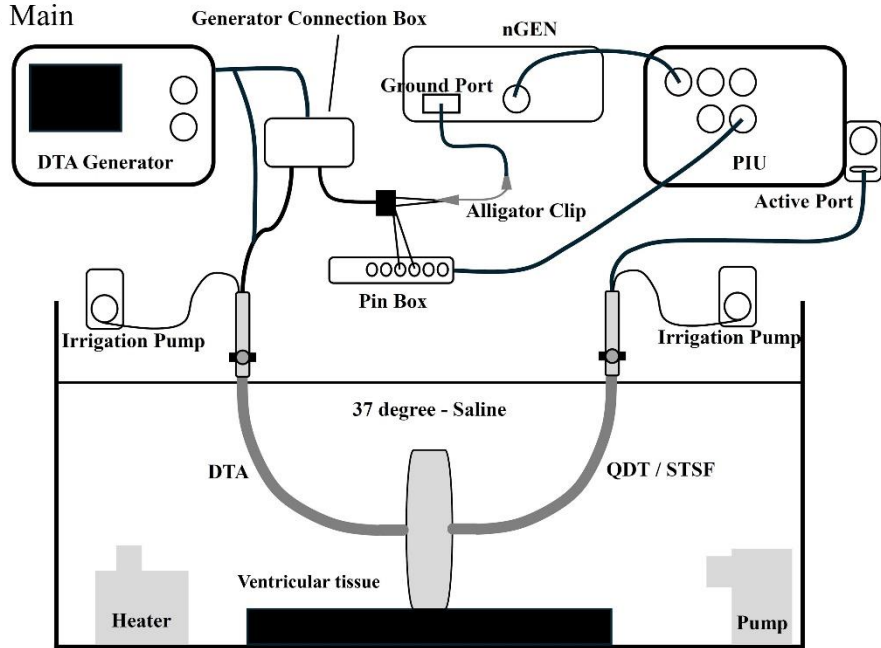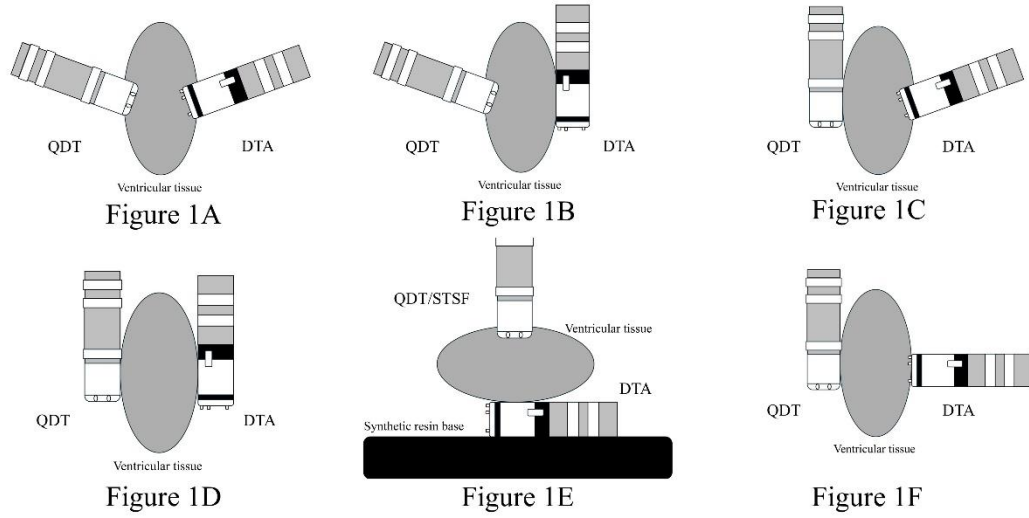

493

494 The circuit model for BRFA using CARTO and DTA is shown. The QDOT/STSF is  
495 connected as the active catheter, attached to the active port in the usual manner. The  
496 DTA is connected to the ground port via an alligator clip. To display the DTA on the  
497 CARTO system during the experiment, only the proximal electrodes of the DTA are  
498 connected to the patient interface unit of the CARTO system via the Pin box.  
499 Furthermore, the contact patterns between each catheter tip and the ventricular  
500 myocardium are shown in Figures 1A through 1F. Figures 1A to 1D illustrate four  
501 different configurations where the QDOT and DTA were adhered perpendicularly  
502 and parallel (Models 1A - 1D). Figure 1E shows a scenario in which the DTA was  
503 sandwiched between the ventricular myocardium and a synthetic resin base to create  
504 conditions prone to steam-pop formation (Model 2). Figure 1F shows a special  
505 configuration in which only the 0.6 mm long distal small tip of the DTA is in contact  
506 with the ventricular myocardium, while the proximal large tip is not in contact with  
507 the tissue (Model 3). DTA, DiamondTemp Ablation<sup>TM</sup>; nGEN, nGEN<sup>TM</sup> generator;  
508 PIU, patient interface unit; QDT. QDOT micro<sup>TM</sup>; STSF, Thermocool  
509 SMARTTOUCH SF<sup>TM</sup>;  
510

511 Figure 2

Figure 1A

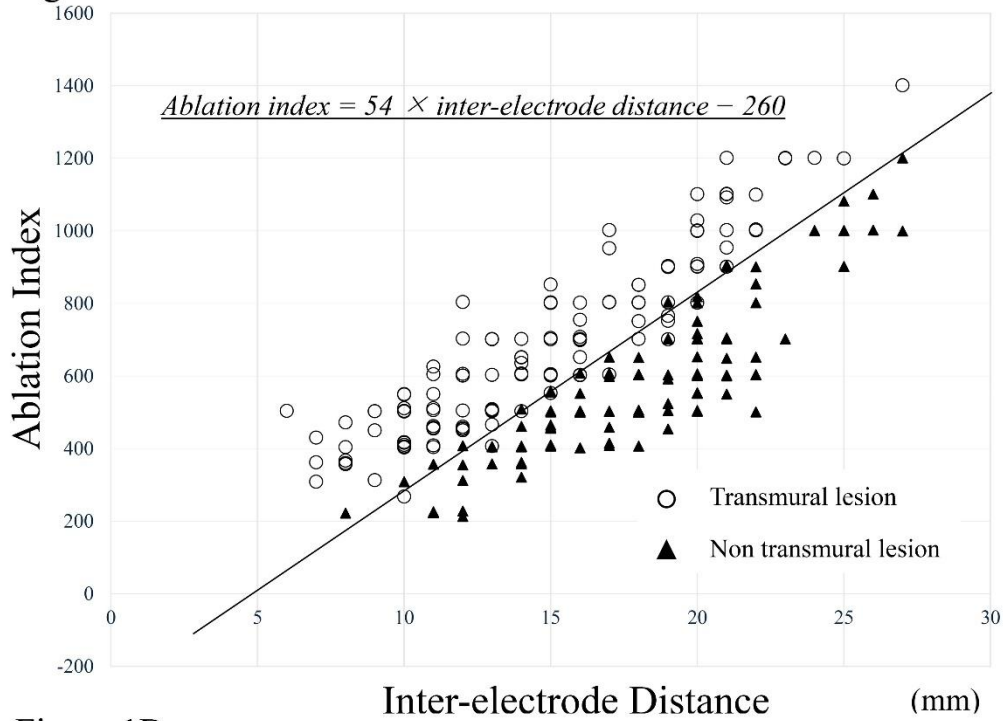

Figure 1B

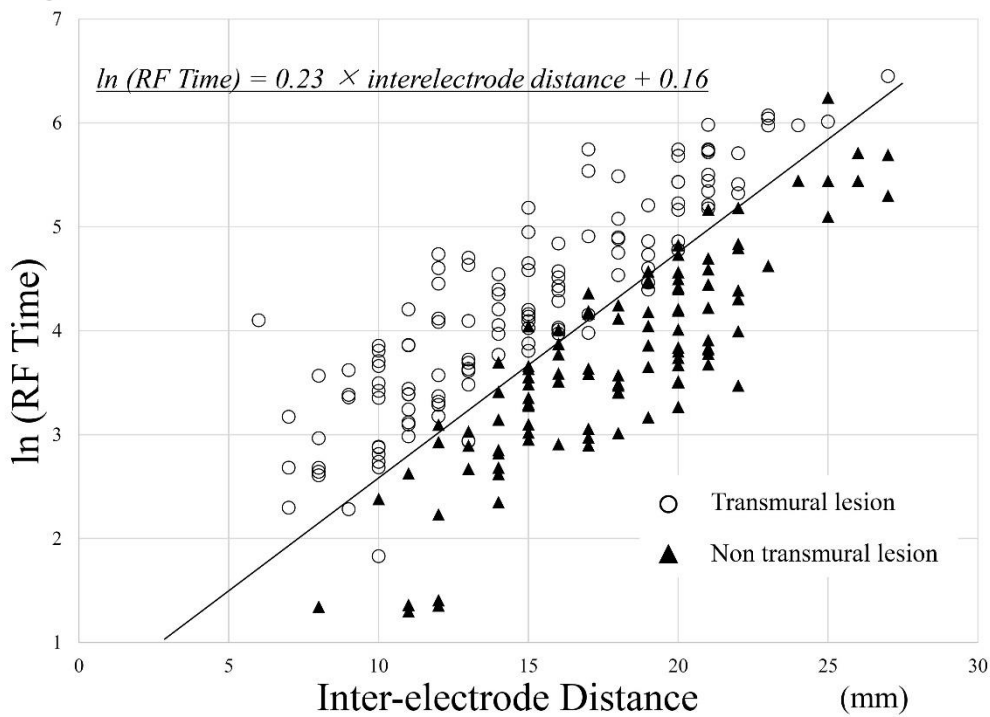

512

513 The relationship between inter-electrode distance, AI, and the logarithm of BRFA  
514 duration is displayed, separated into ablations with and without transmural lesion  
515 formation. The AI and ln (BRFA duration) required to achieve transmural lesion  
516 formation increase linearly as the inter-electrode distance increases. The decision  
517 boundary equations for achieving and not achieving transmural lesion formation are  
518  $AI = 54 \times \text{inter-electrode distance} - 260$  and  $\ln (\text{BRFA duration}) = 0.23 \times$   
519  $\text{interelectrode distance} + 0.16$ , respectively. AI, ablation index; BRFA, bipolar  
520 radiofrequency catheter ablation; inter-electrode distance, the distance between  
521 electrodes used in BRFA  
522



525 Comparison of the maximum DTA temperature and maximum % Impedance drop in  
526 ablation without steam-pop, and the DTA temperature and % Impedance drop at the  
527 time of steam-pop in ablation where steam-pop occurred. Figure 3A shows that all  
528 steam-pops occurred only when the DTA temperature was 55°C or higher. Similarly,  
529 Figure 3B shows that all steam-pops occurred only when the % Impedance drop was  
530 13% or higher.  
531 DTA, DiamondTemp Ablation<sup>TM</sup>; %Impedance drop, the rate of generator  
532 impedance drop.  
533





536 The relationship between the depth of visually confirmed cracks in ablation where  
537 steam-pop occurred, and the DTA temperature and % impedance drop at the time of  
538 steam-pop. Cracks with a depth of 25% or more were observed only when  
539 steam-pop occurred with the DTA temperature reaching 60°C or higher. (Figure 4A)  
540 Similarly, cracks with a depth of 50% or more were observed only when the %  
541 impedance drop increased by 21% or more. (Figure 4B)  
542 Abbreviations are the same as in Figure 3.  
543  
544

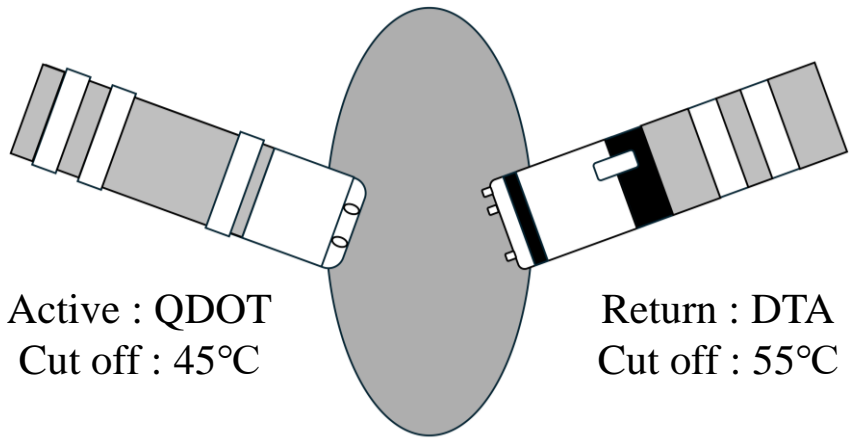

- ✓ When AI exceeds  $54 \times$  inter-electrode distance - 260, transmural lesion formation can be achieved with high accuracy.
- ✓ With a 45°C cut-off, there was no steam-pop on the QDOT side.
- ✓ All steam-pops on the DTA side occurred at 55°C or higher.
- ✓ The higher the temperature of the DTA at the time of steam-pop, the deeper the cracks.

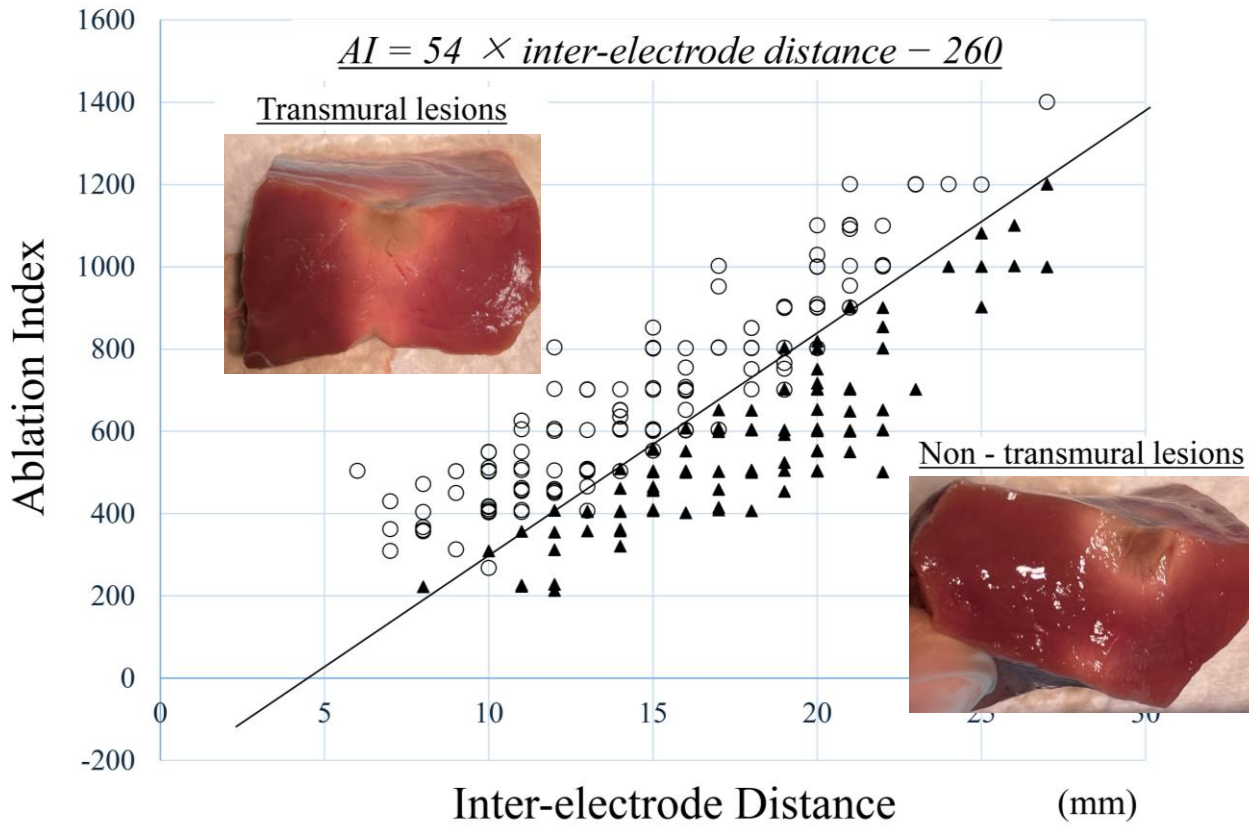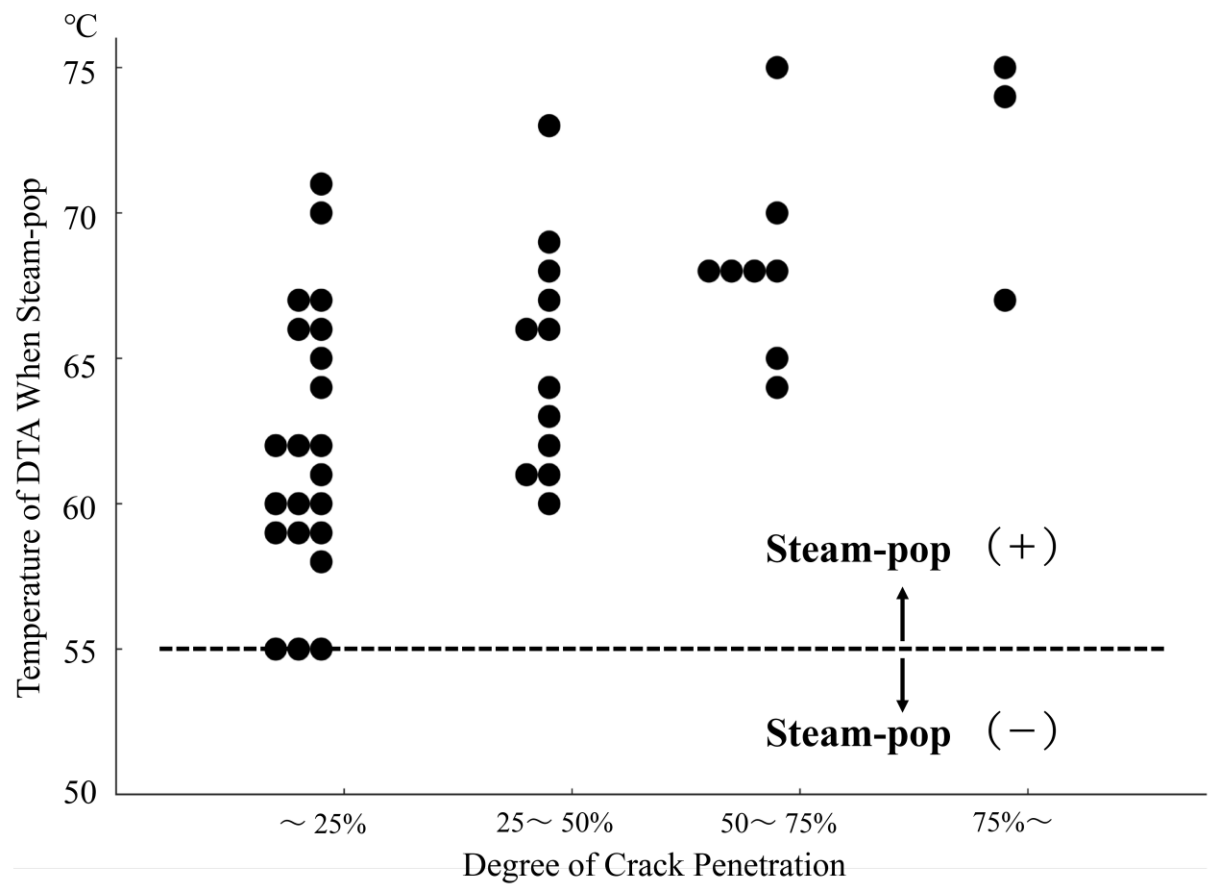

Source: https://medrxiv.org/content/10.1101/2024.11.11.24317133v1.full.pdf
